# Supplementary material for: Combining machine learning and SMILEs to classify, better understand, and project changes in ENSO events
Source: Copernicus journal article supplement (doi:10.5194/esd-2021-105), 2022-01-25
Supplement: Supplementary file 1 [file esd-2021-105-supplement.pdf]

# Supplementary Information: Combining machine learning and SMILEs to classify, better understand, and project changes in ENSO events

Nicola Maher<sup>1,2</sup>, Thibault P. Tabarin<sup>3</sup>, and Sebastian Milinski<sup>1,4,5</sup>

<sup>1</sup>Max Planck Institute for Meteorology, Hamburg, Germany

<sup>2</sup>Cooperative Institute for Research in Environmental Sciences (CIRES) and Department of Atmospheric and Oceanic Sciences (ATOC), University of Colorado at Boulder, Boulder, CO 80309, USA

<sup>3</sup>Freelancer, Boulder, CO 80303, USA

<sup>4</sup>Climate and Global Dynamics Division, National Center for Atmospheric Research, Boulder, CO 80307, USA

<sup>5</sup>Cooperative Programs for the Advancement of Earth System Science, University Corporation for Atmospheric Research, Boulder, CO 80307, USA

**Correspondence:** Nicola Maher (nicola.maher@colorado.edu)

## 1 Datasets and additional Figures

The observational and reanalysis datasets used in this study are shown in Table S1. The single model initial-condition large ensembles (SMILEs) used in the study are found in Table S2. Figure S1 shows the same Hovmöller from Figure 2 of the main paper for SST anomalies, rather than relative SST. Figure S2 shows the relationship between the projected change of the mean-state SST gradient and the projected change in EP and CP event amplitude.

## 2 Supplementary Methods

### 2.1 Choice of features

In this study we tested three sets of input features (Table S3). First we use only the three niño indices 1, 2, 3 and 4 averaged over austral summer (DJF), which is the peak ENSO season. We find that the classifier can already perform reasonably well using just this limited amount of information. However, the precision score is not as high for the CP events as the other classes. Next we add temporal information, which we hypothesise should help to better classify the CP events as they evolve differently in the temporal domain than EP events. We find that this improves the overall classifier performance, especially when considering the CP and EP events, which are now more precisely classified. Finally, we add additional spatial information by splitting the niño 3 and 4 regions into halves (east and west). We perform this split at the niño3.4 boundary. This does not improve the overall classifier performance. Given this does not decrease the classifier performance and more features may be useful when later applying the algorithm to climate models we use this as the final feature set. We note that we also tested a classifier that had all grid points between 160°E, 90°W, 15°S and 15°N, where all data was regridded to a 1x1 spatial grid first (full

**Table S1.** Input datasets used in this study.

| dataset                    | years     | reference                |
|----------------------------|-----------|--------------------------|
| AMSREv07                   | 2002-2010 | Systems (2014)           |
| COBEv1                     | 1896-2019 | Ishii et al. (2005)      |
| COBESST2                   | 1896-2018 | Hirahara et al. (2014)   |
| HadISST                    | 1896-2017 | Rayner et al. (2003)     |
| ERSSTv3b                   | 1896-2018 | Smith et al. (2010)      |
| ERSSTv4                    | 1896-2018 | Huang et al. (2015)      |
| ERSSTv5                    | 1896-2019 | Huang et al. (2017)      |
| GECCO2                     | 1948-2016 | Köhl (2015)              |
| GODAS                      | 1980-2019 | Behringer and Xue (2004) |
| kaplan                     | 1896-2019 | Kaplan et al. (1998)     |
| OISST                      | 1981-2018 | Reynolds et al. (2007)   |
| ORAS4                      | 1958-2016 | Balmaseda et al. (2012)  |
| ORAs5 (5 ensemble members) | 1979-2017 | Zuo et al. (2019, 2017)  |
| soda3.11.2                 | 1980-2015 | Carton et al. (2018)     |
| soda3.12.2                 | 1980-2017 | Carton et al. (2018)     |
| soda3.4.2                  | 1980-2018 | Carton et al. (2018)     |
| soda3.6.1                  | 1980-2008 | Carton et al. (2018)     |
| soda3.7.2                  | 1980-2016 | Carton et al. (2018)     |

**Table S2.** SMILEs used in this study, the length of their historical period, the forcing scenario used and the reference for the dataset.

| SMILE      | historical period | scenario | ensemble size | reference                                             |
|------------|-------------------|----------|---------------|-------------------------------------------------------|
| MPI-GE     | 1850-2005         | RCP8.5   | 100           | Maher et al. (2019)                                   |
| CESM-LE    | 1920-2005         | RCP8.5   | 40            | Kay et al. (2015)                                     |
| CanESM2    | 1950-2020         | RCP8.5   | 50            | Kirchmeier-Young et al. (2017); Kushner et al. (2018) |
| GFDL-ESM2M | 1950-2005         | RCP8.5   | 30            |                                                       |
| CSIRO      | 1850-2005         | RCP8.5   | 30            | Jeffrey et al. (2012)                                 |
| CanESM5    | 1850-2014         | SSP370   | 23            | Swart et al. (2019)                                   |
| IPSL-CM6A  | 1850-2014         | n/a      | 26            | Boucher et al. (2020)                                 |

region). In this case the scores are low. We note that this result is dependent on the classifier used. We find that the nearest neighbour classifier performs poorly, which is likely due to its difficulty to perform, when the data has too many dimensions.

20 A neural network also performs poorly, likely due to too much redundant information, and over-fitting. This is an example of how 'fat data', too many features, with quite a low number of events can cause an algorithm to fail. We note that a random forest algorithm, which is built to avoid over-fitting, performs well, but still not as well as using niño regions alone.

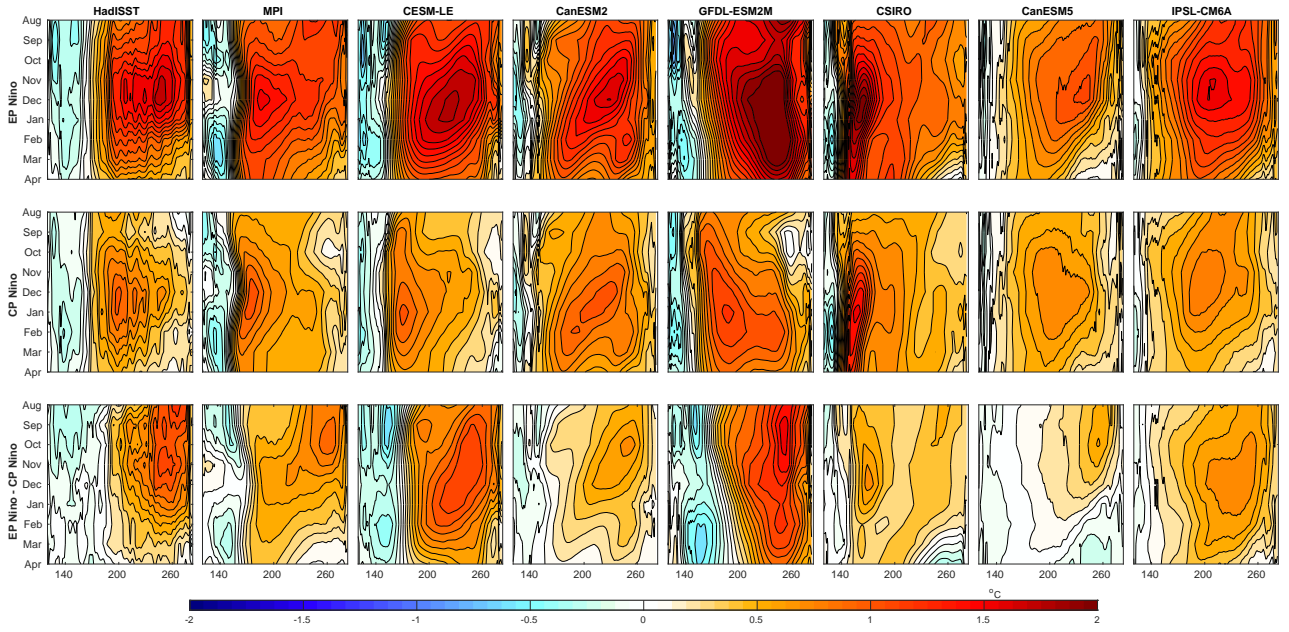

**Figure S1.** Hovmöller of SST along the equator in the Pacific Ocean for composites of EP and CP El Niños, and EP-CP El Niños (top, middle and bottom row respectively). Shown for HadISST observations (left column) and each individual SMILE (in order of appearance; MPI-GE, CESM-LE, CanESM2, GFDL-ESM2M, CSIRO, CanESM5 and IPSL-CM6A). SST is averaged between 5N and 5S and shown for August to April. SMILE data has the forced response (ensemble mean) removed prior to calculation, HadISST is detrended using a second order polynomial then each months average is removed. The time period used is all of the historical, which is shown for the observations in Table S1 and SMILES in Table S2.

## 2.2 Choice of algorithm

First we identified all standard algorithms used for supervised learning in python (Table S4) and tested their performance. In this case we train the classifier on all datasets bar HadISST, which we hold aside for testing. We additionally tested ensemble classifiers that used a combination of the standard algorithms (Table S4). We exclude algorithms 4, 6, and 7 as they have low precision for CP events. The final classifier used in this study is an ensemble of algorithms 1,5 & 9 with soft voting. This algorithm performs best when considering all scores.

Within the final classifier we optimised the three input algorithms to find the best possible parameters for performance. As a last step we test whether a two-step classifier would perform better than a one-step classifier. The two steps for the two-step classifier are as follows:

1. Train the algorithm to classify into three categories LN, NE and EN (all El Niño events)
2. Then re classify EN into EL and CP

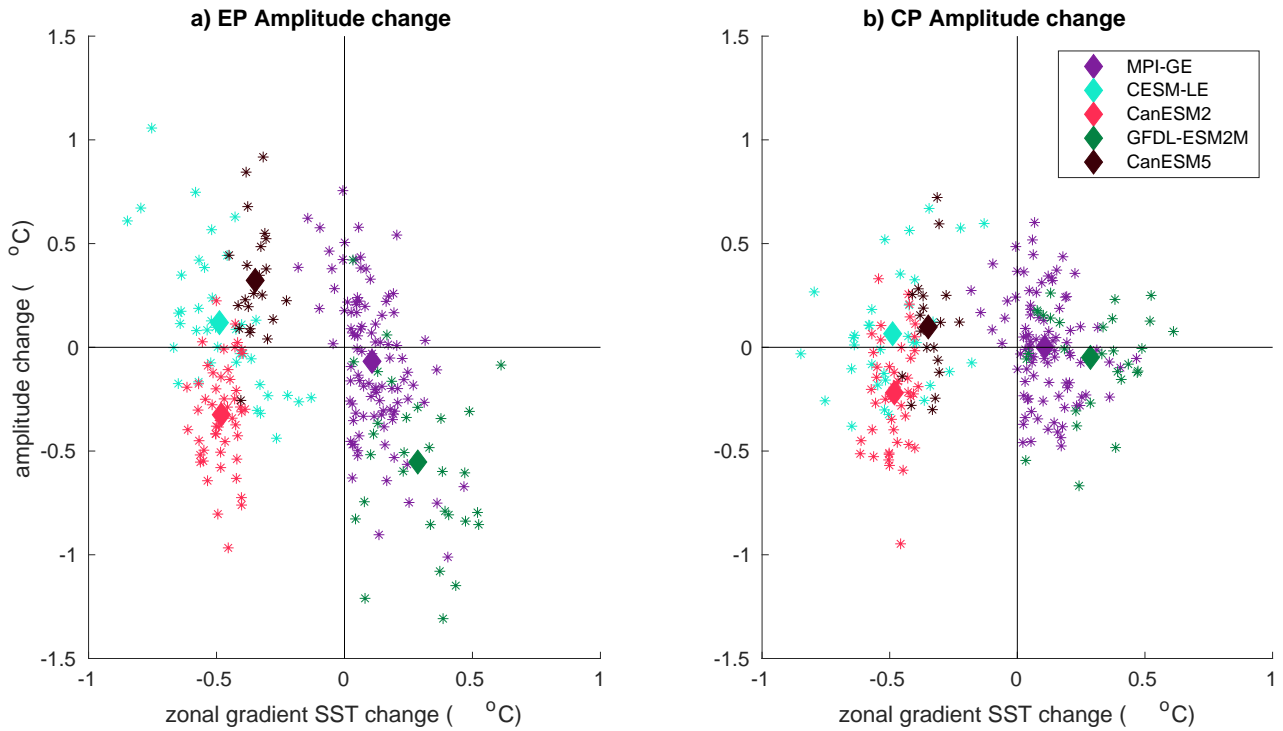

**Figure S2.** Relationship between future projected change in ENSO amplitude and the projected change of the mean-zonal gradient. Shown for a) EP El Niños and b) CP El Niños. Amplitude is calculated as the November, December, January mean for the region 160E to 80W between 5N and 5S after the ensemble mean has been removed for each event. All changes are calculated over the period 2069-2098 compared to 1950-1979. The zonal mean gradient is calculated as the difference in SST in the western Pacific (5S-5N and 150-180E) minus the eastern Pacific (5S-5N and 80-180W) as in Wang et al. (2019).

Theoretically this could help the classifier perform due to the low numbers of EL and CP events. However, we find that this does not improve our classifier (Table S4) and as such choose to use the simpler one-step classifier for the rest of this study.

**Table S3.** Scores for different feature inputs tested. Scores are defined in section 2.2 of the main paper. The full tropical Pacific is 160E-80W and 15S-15N.

| Features used                               | Accuracy | CVS  | P-CP | P-EP | P-LN | P-NE |
|---------------------------------------------|----------|------|------|------|------|------|
| DJF-mean Niño 12,3,4                        | 0.73     | 0.73 | 0.54 | 0.70 | 0.93 | 0.73 |
| O,N,D,J,F,M-months Niño 12,3,4              | 0.94     | 0.90 | 0.92 | 1    | 1    | 0.91 |
| <b>O,N,D,J,F,M-months Niño 12,3E/W,4E/W</b> | 0.93     | 0.92 | 0.92 | 1    | 1    | 0.90 |
| O,N,D,J,F,M-months Full tropical Pacific    | 0.47     | 0.66 | 0.27 | 0.45 | 0.48 | 0.65 |
| Nearest Neighbours n=1                      | 0.35     | 0.61 | 0.21 | 0.29 | 0.30 | 0.54 |
| Neural Network                              | 0.11     | 0.30 | 0.1  | 0    | 0    | 0    |
| Random Forest                               | 0.85     | 0.90 | 0.75 | 0.95 | 0.90 | 0.83 |

**Table S4.** Scores for different algorithms tested. Scores are defined in section 2.2 of the main text.

| Algorithm                      | Accuracy | CVS  | P-CP | P-EP | P-LN | P-NE |
|--------------------------------|----------|------|------|------|------|------|
| (1) NearestNeighbours          | 0.93     | 0.88 | 0.86 | 1    | 1    | 0.90 |
| (2) LinearSVM                  | 0.82     | 0.80 | 0.64 | 0.89 | 1    | 0.79 |
| (3) RBFSVM                     | 0.66     | 0.63 | 1    | 1    | 1    | 0.60 |
| (4) DecisionTree               | 0.77     | 0.81 | 0.46 | 0.94 | 0.89 | 0.82 |
| (5) NeuralNet                  | 0.85     | 0.87 | 0.75 | 0.90 | 1    | 0.81 |
| (6) AdaBoost                   | 0.59     | 0.55 | 0.25 | 0    | 0.73 | 0.84 |
| (7) NaiveBayes                 | 0.72     | 0.69 | 0.4  | 0.85 | 0.81 | 0.83 |
| (8) QDA                        | 0.83     | 0.82 | 1    | 0.8  | 1    | 0.78 |
| (9) RandomForest               | 0.79     | 0.76 | 0.77 | 0.83 | 1    | 0.75 |
| Hard Vote (1,3,5,9)            | 0.92     | 0.92 | 0.86 | 1    | 1    | 0.89 |
| Hard Vote (1,2,5,9)            | 0.92     | 0.91 | 0.86 | 1    | 1    | 0.90 |
| Hard Vote (1,2,3,5,7,8,9)      | 0.89     | 0.90 | 0.92 | 1    | 1    | 0.84 |
| 2-step soft vote (1,5,9)       | 0.93     | n/a  | 0.92 | 1    | 1    | 0.9  |
| <b>FINAL</b> Soft vote (1,5,9) | 0.93     | 0.92 | 0.92 | 1    | 1    | 0.9  |

**3 Shifted niño regions**

Given climate models have known ENSO biases, particularly in the location of SST anomalies along the equator, we additionally classify by shifting the longitudes of the niño regions. This shift is defined as the difference in location between the maximum variability between 5N and 5S in the Pacific Ocean in the observations and the maximum variability in each individual SMILE (Table S5). We find that this does not significantly change the results in the main text except for CSIRO frequency where EP El Niños and La Niñas are now more realistically represented. The spatial patterns for each model (Figure S3) and evolution of SST anomalies (Figure S4) are very similar when applying this shift. This method additionally does not change the results for ENSO frequency (Figure S5) or amplitude (Figure S6).

**4 Extreme El Niños**

**4.1 Method**

We additionally investigate Extreme El Niño events, by including the strongest events in the observational period as their own class *strong El Niños (ST)*. The years defined as ST El Niños are 1957,1965, 1972, 1982, 1987,1997 and 2015. We choose only to include strong EP events in this category. We use the same ensemble classifier algorithm to classify these events. The algorithm performs well when the original training and evaluation are used (Table S6). However, this algorithm performs less well when we test the sensitivity to this construction. In this case the precision of EP and ST events is reduced and can be as

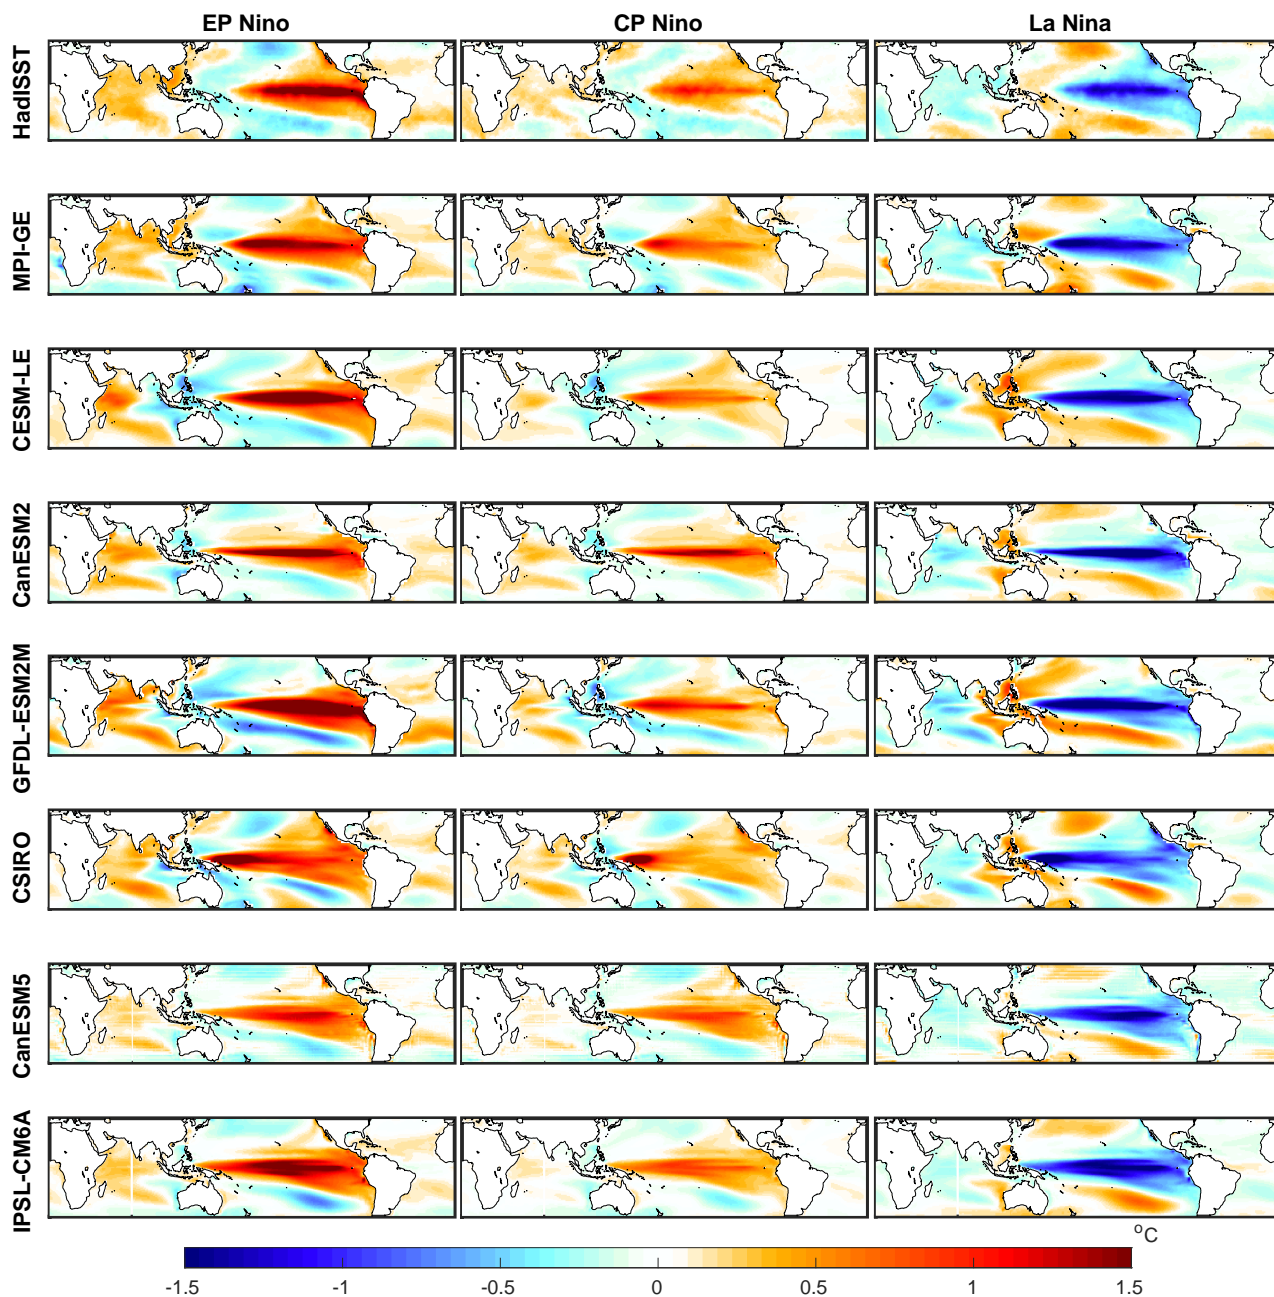

**Figure S3.** SST pattern for composites of EP, CP and LN events (left, middle and right columns respectively) for the shifted centers of variability. Shown for HadISST observations (top row) and each individual SMILE (in order of appearance; MPI-GE, CESM-LE, CanESM2, GFDL-ESM2M, CSIRO, CanESM5 and IPSL-CM6A). SST pattern is shown for the November, December, January average. SMILE data has the forced response (ensemble mean) removed prior to calculation, HadISST is detrended using a second order polynomial then each months average is removed. The time period used is all of the historical, which is shown for the observations in Table S1 and SMILEs in Table S4.

**Table S5.** Frequency of events (as a percentage) in the historical period for observations (HadISST) and the SMILEs as well as the correlation between EP and CP patterns shown for the shifted center of variability. The mean frequency and correlation across each ensemble is shown with the minimum and maximum in brackets. The time period used is all of the historical, which is shown for the observations in Table S1 and SMILEs in Table S2.

| Model      | EP no ev shift   | CP no ev shift   | LN no ev shift   | EP/CP shift-corr | shift longitude |
|------------|------------------|------------------|------------------|------------------|-----------------|
| HadISST    | 16.1             | 11.2             | 21.0             | 0.85             | na              |
| MPI-GE     | 15.6 (9.0/21.9)  | 11.0 (4.5/18.1)  | 15.9 (7.1/20.6)  | 0.72 (0.59/0.92) | -11             |
| CESM-LE    | 23.2 (17.6/29.4) | 7.7 (2.4/11.8)   | 23.9 (15.3/35.3) | 0.69 (0.42/0.88) | -8              |
| CanESM2    | 20.6 (11.4/28.6) | 9.9 (2.3/17.1)   | 21.3 (10/28.6)   | 0.83 (0.59/0.94) | -11             |
| GFDL-ESM2M | 17.3 (10.9/23.6) | 20.0 (12.7/25.5) | 25.3 (16.4/36.4) | 0.71 (0.56/0.92) | -12             |
| CSIRO      | 11.6 (7.1/15.2)  | 17.1 (10.3/23.9) | 16.1 (11.0/20.6) | 0.85 (0.79/0.92) | -26             |
| CanESM5    | 11.2 (6.7/17.1)  | 5.1 (1.2/9.8)    | 13.6 (9.8/18.3)  | 0.79 (0.51/0.88) | -10             |
| IPSL-CM6A  | 18.7 (14.6/22.0) | 7.6 (3.6/12.8)   | 18.7 (14.6/22.6) | 0.80 (0.67/0.90) | -11             |

low as zero for the ST events (Table S6), likely due to the small number of events in this class. This means that the classifier is less well constrained when including ST events. Because of this we used the better constrained algorithm that does not include ST events to present the main finding of this study and discuss this additional algorithm for ST here in the Supplementary.

We then apply the classifier that includes extreme El Niños (ST) to the same set of SMILEs and compare the results for the EP and ST classes from this new classification. We find that the evolution of SST anomalies on the equator is similar for EP and ST events, however the ST events have much larger SST anomalies demonstrating that this classifier is now splitting the original set of EP events into weaker and stronger subsets (Figure S7).

### 4.2 Results

When considering projections of amplitude and frequency (Figure S8) we find that the CESM-LE and CanESM5 amplitude increases occur for only the EP events, but that the CanESM2 and GFDL-ESM2M decreases occur for both types of El Niño. For frequency we find that the projected changes are confined to the ST events, demonstrating that it is the stronger events that drive the changes previously seen in the EP class. Last, the SST and precipitation projected changes are similar for EP and ST events (Figure S9), with the changes consistently stronger for the extreme El Niños. These results are in conflict with previous work that finds an increase extreme EP events in future (Cai et al., 2014, 2018, 2021). However, based on limitations of our classification due to the small number of ST events available to train the classifier as well as clear model differences found, this warrants further investigation in future work.



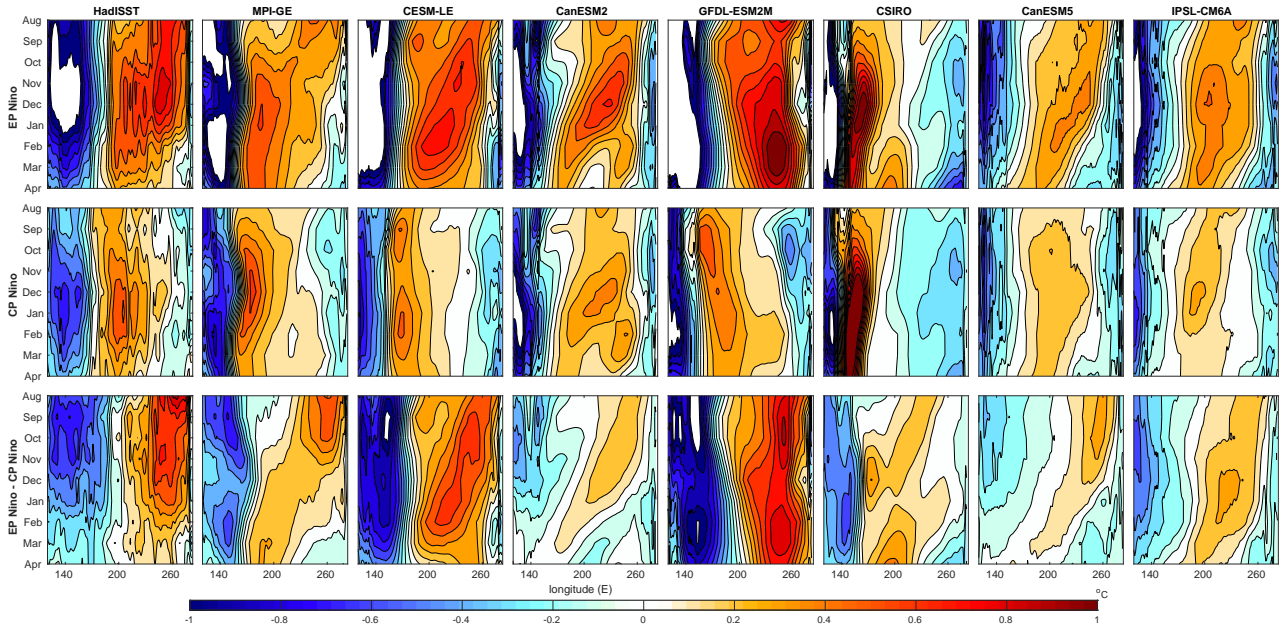

**Figure S4.** Hovmöller of relative SST along the equator in the Pacific Ocean for composites of EP, CP El Niños and EP-CP El Niños (top, middle and bottom row respectively) for the shifted centers of variability. Shown for HadISST observations (left column) and each individual SMILE (in order of appearance; MPI-GE, CESM-LE, CanESM2, GFDL-ESM2M, CSIRO, CanESM5 and IPSL-CM6A). SST is averaged between 5N and 5S and shown for August to April. SMILE data has the forced response (ensemble mean) removed prior to calculation, HadISST is detrended using a second order polynomial then each months average is removed. The time period used is all of the historical, which is shown for the observations in Table S1 and SMILEs in Table S4. Relative SST is calculated by removing the average SST between 120E and 280E individually for each month.

**Table S6.** Minimum, mean and maximum scores for the ensemble classifier. Test 1 uses all available data, with HadISST kept aside for testing. This split is completed 10 times to find the minimum and maximum scores possible due to random noise. Test 2 uses the longer datasets, ERSST, COBE, Kaplan and HadISST for training and testing. The data is split so that the augmented events must all occur in the same section of the data. To complete this we use the python function *train test split*. 10 splits are manually chosen to ensure that they sample events from across the time-dimension and have a reasonable amount of each type of event.

| Test           | Min/Max score | Accuracy | clf  | P-CP | P-EP | P-LN | P-NE | P-ST |
|----------------|---------------|----------|------|------|------|------|------|------|
| Test 1         | Min           | 0.93     | 0.91 | 0.92 | 1    | 1    | 0.9  | 1    |
|                | Mean          | 0.93     | 0.91 | 0.92 | 1    | 1    | 0.9  | 1    |
|                | Max           | 0.93     | 0.92 | 0.92 | 1    | 1    | 0.9  | 1    |
| Test 2 w/check | Min           | 0.56     | 0.93 | 0.39 | 0.23 | 0.55 | 0.66 | 0    |
|                | Mean          | 0.69     | 0.94 | 0.55 | 0.42 | 0.83 | 0.76 | 0.61 |
|                | Max           | 0.79     | 0.94 | 0.79 | 0.57 | 1    | 0.87 | 1    |



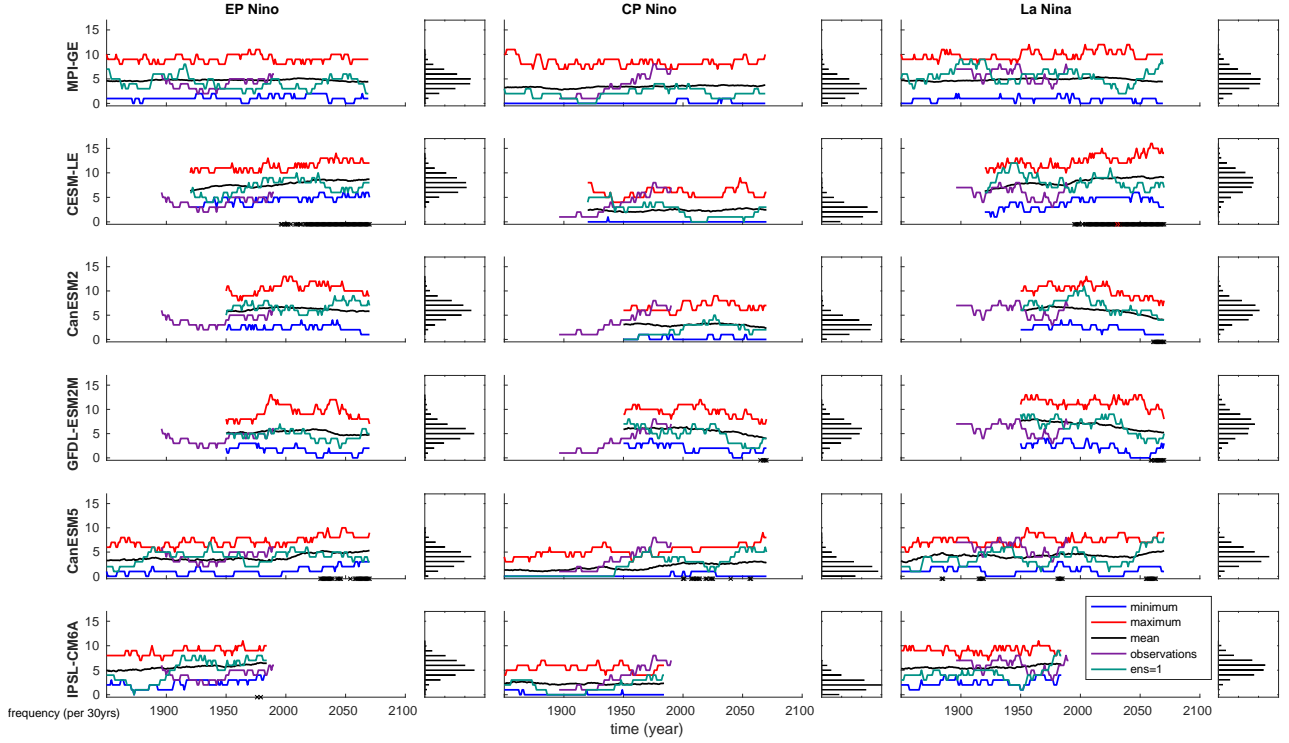

**Figure S5.** ENSO frequency in each SMILE for EP, CP and LN events (left, middle and right columns respectively) for the shifted centers of variability. Black line shows the ensemble mean for each year, red line shows the ensemble maximum and the blue line the ensemble minimum. Dashed lines represent the same result for the shifted tropical Pacific variability. Frequency is calculated as the number of events in a single ensemble member per 30 years, taken as a running calculation along the time-series. PDFs show the distribution of ensemble members for the entire time-series. Black dots on the x-axis demonstrate when the signal (current ensemble mean minus the ensemble mean at the beginning of the time-series) is greater than the noise (standard deviation taken across the ensemble). Red dots show when the signal is 1.645 times the noise, while magenta dots show the same when the signal is greater than 2 times the noise. These thresholds correspond to the *likely*, *very likely* and *extremely likely* ranges.

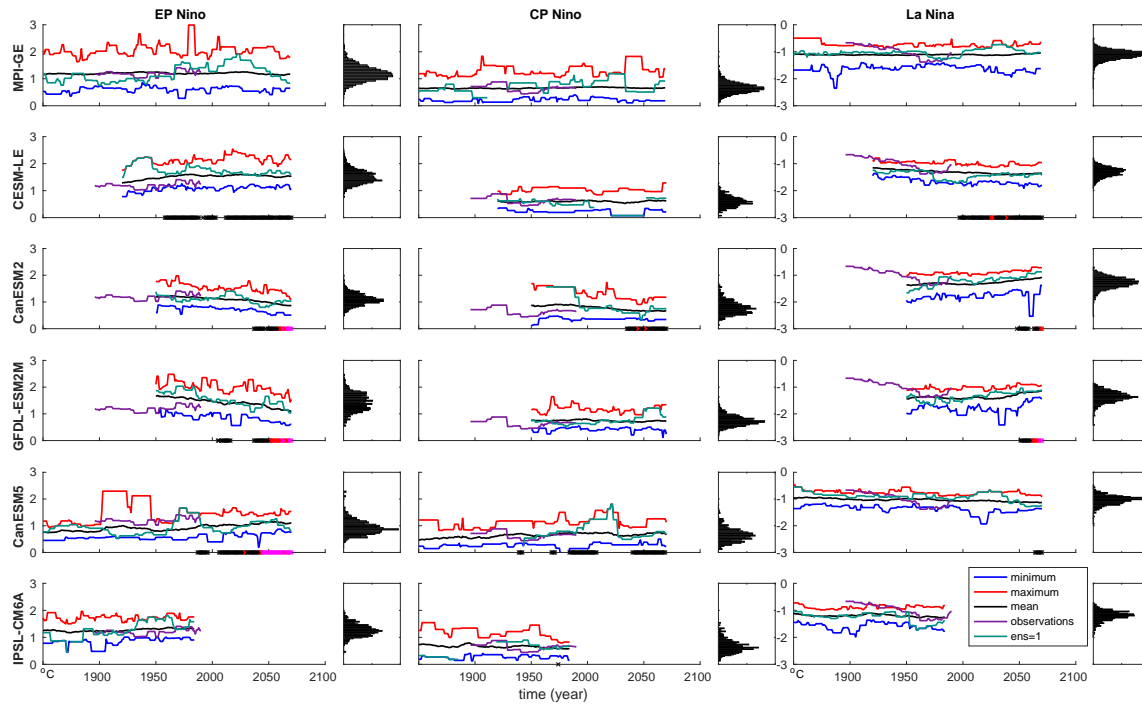

**Figure S6.** ENSO amplitude in each SMILE for EP, CP and LN events (left, middle and right columns respectively) for the shifted centers of variability. Black line shows the ensemble mean for each year, red line shows the ensemble maximum and the blue line the ensemble minimum. Dashed lines represent the same result for the shifted tropical Pacific variability. Amplitude is calculated as the November, December, January mean for the region 160E to 80W between 5N and 5S after the ensemble mean has been removed for each event. PDFs show the distribution of ensemble members for the entire time-series. Black dots on the x-axis demonstrate when the signal (current ensemble mean minus the ensemble mean at the beginning of the time-series) is greater than the noise (standard deviation taken across the ensemble). Red dots show when the signal is 1.645 times the noise, while magenta dots show the same when the signal is greater than 2 times the noise. These thresholds correspond to the *likely*, *very likely* and *extremely likely* ranges.

## References

- Balmaseda, M. A., Mogensen, K., and Weaver, A. T.: Evaluation of the ECMWF ocean reanalysis system ORAS4, *Quarterly Journal of the Royal Meteorological Society*, 139, 1132–1161, <https://doi.org/10.1002/qj.2063>, 2012.
- 70 Behringer, D. and Xue, Y.: Evaluation of the global ocean data assimilation system at NCEP: The Pacific Ocean. Eighth Symposium on Integrated Observing and Assimilation Systems for Atmosphere, Oceans, and Land Surface, AMS 84th Annual Meeting, Washington State Convention and Trade Center, Seattle, Washington, 11-15, 2004.
- Boucher, O., Servonnat, J., Albright, A. L., Aumont, O., Balkanski, Y., Bastrikov, V., Bekki, S., Bonnet, R., Bony, S., Bopp, L., Braconnot, P., Brockmann, P., Cadule, P., Caubel, A., Cheruy, F., Codron, F., Cozic, A., Cugnet, D., D’Andrea, F., Davini, P., de Lavergne, C., Denvil, S., Deshayes, J., Devilliers, M., Ducharne, A., Dufresne, J.-L., Dupont, E., Éthé, C., Fairhead, L., Falletti, L., Flavoni, S., 75 Foujols, M.-A., Gardoll, S., Gastineau, G., Ghattas, J., Grandpeix, J.-Y., Guenet, B., Guez, Lionel, E., Guilyardi, E., Guimberteau, M.,

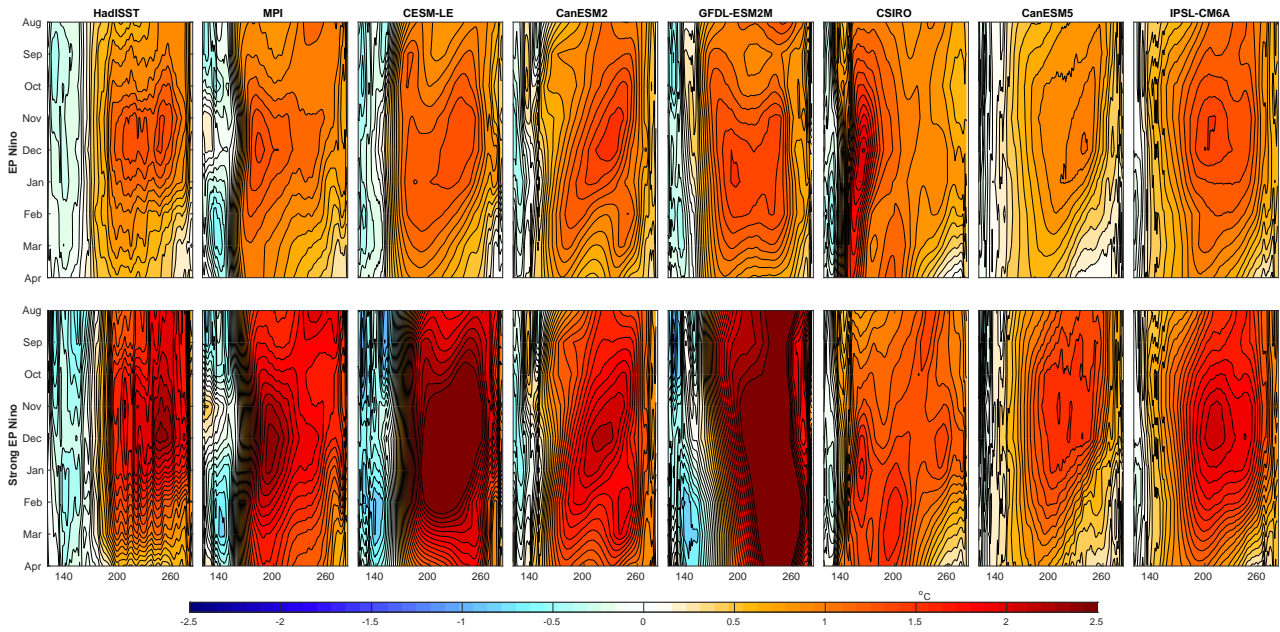

**Figure S7.** Hovmöller of average SST along the equator in the Pacific Ocean for composites of EP, and ST events (top and bottom row respectively). Shown for HadISST observations (left column) and each individual SMILE (in order of appearance; MPI-GE, CESM-LE, CanESM2, GFDL-ESM2M, CSIRO, CanESM5 and IPSL-CM6A). SST is averaged between 5N and 5S and shown for August to April. SMILE data has the forced response (ensemble mean) removed prior to calculation, HadISST is detrended using a second order polynomial then each months average is removed. The time period used is all of the historical, which is shown for the observations in Table S1 and SMILEs in Table S2. Nore update labels to match other figs.

- Hauglustaine, D., Hourdin, F., Idelkadi, A., Joussaume, S., Kageyama, M., Khodri, M., Krinner, G., Lebas, N., Levvasseur, G., Lévy, C., Li, L., Lott, F., Lurton, T., Luyssaert, S., Madec, G., Madeleine, J.-B., Maignan, F., Marchand, M., Marti, O., Mellul, L., Meurdesoif, Y., Mignot, J., Musat, I., Ottlé, C., Peylin, P., Planton, Y., Polcher, J., Rio, C., Rochetin, N., Rousset, C., Sepulchre, P., Sima, A., Swingedouw, D., Thiéblemont, R., Traore, A. K., Vancoppenolle, M., Vial, J., Vialard, J., Viovy, N., and Vuichard, N.: Presentation and Evaluation of the IPSL-CM6A-LR Climate Model, *Journal of Advances in Modeling Earth Systems*, 12, e2019MS002010, <https://doi.org/https://doi.org/10.1029/2019MS002010>, e2019MS002010 10.1029/2019MS002010, 2020.
- Cai, W., Borlace, S., Lengaigne, M., van Rensch, P., Collins, M., Vecchi, G., Timmermann, A., Santoso, A., McPhaden, M. J., Wu, L., England, M. H., Wang, G., Guilyardi, E., and Jin, F.-F.: Increasing frequency of extreme El Niño events due to greenhouse warming, *Nature Climate Change*, 4, 111–116, <https://doi.org/10.1038/nclimate2100>, 2014.
- Cai, W., Wang, G., Dewitte, B., Wu, L., Santoso, A., Takahashi, K., Yang, Y., Carréric, A., and McPhaden, M. J.: Increased variability of eastern Pacific El Niño under greenhouse warming, *Nature*, 564, 201–206, <https://doi.org/10.1038/s41586-018-0776-9>, 2018.
- Cai, W., Santoso, A., Collins, M., Dewitte, B., Karamperidou, C., Kug, J.-S., Lengaigne, M., McPhaden, M. J., Stuecker, M. F., Taschetto, A. S., Timmermann, A., Wu, L., Yeh, S.-W., Wang, G., Ng, B., Jia, F., Yang, Y., Ying, J., Zheng, X.-T., Bayr, T., Brown, J. R., Capotondi, A., Cobb, K. M., Gan, B., Geng, T., Ham, Y.-G., Jin, F.-F., Jo, H.-S., Li, X., Lin, X., McGregor, S., Park, J.-H., Stein, K., Yang,

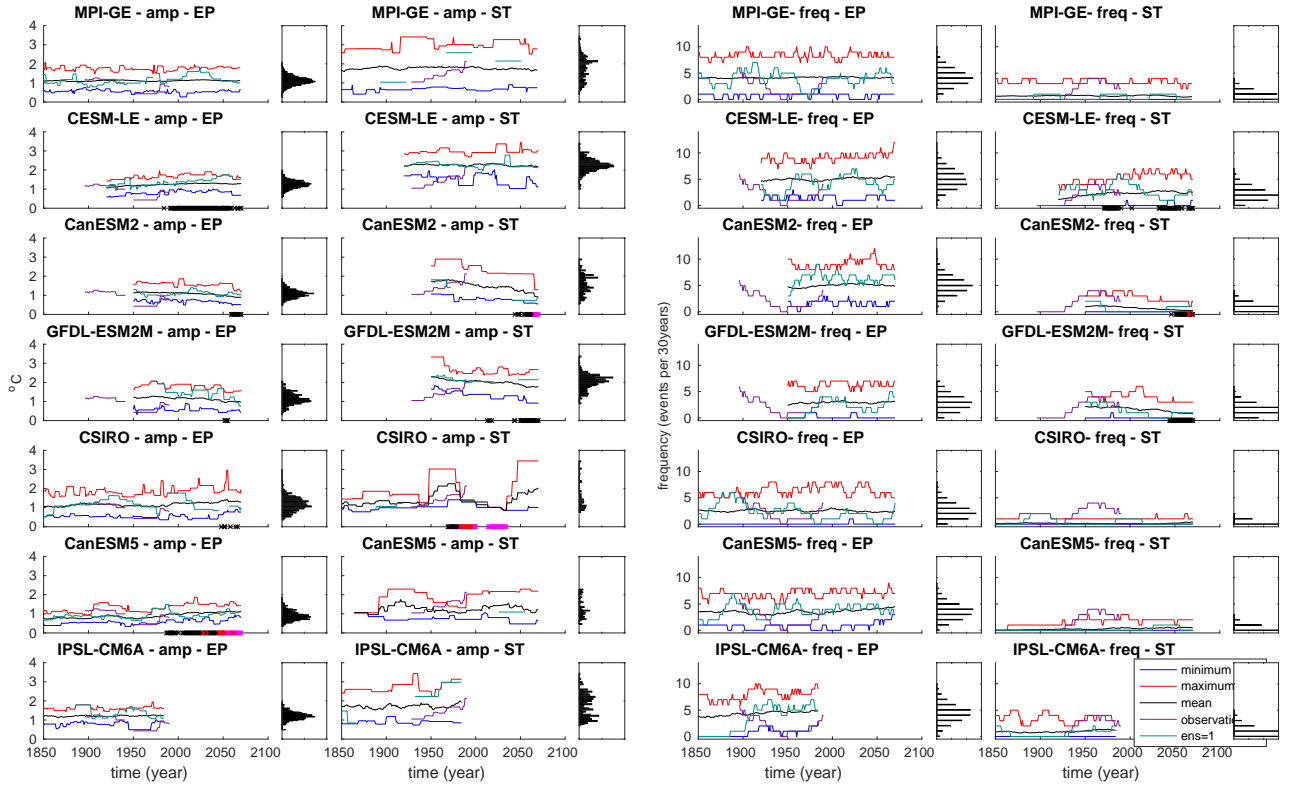

**Figure S8.** ENSO amplitude and frequency in each SMILE for EP and ST events. Black line shows the ensemble mean for each year, red line shows the ensemble maximum and the blue line the ensemble minimum. Dashed lines represent the same result for the shifted tropical Pacific variability. Amplitude is calculated as the November, December, January mean for the region 160E to 80W between 5N and 5S after the ensemble mean has been removed for each event. Frequency is calculated as the number of events in a single ensemble member per 30 years, taken as a running calculation along the time-series. PDFs show the distribution of ensemble members for the entire time-series. Black dots on the x-axis demonstrate when the signal (current ensemble mean minus the ensemble mean at the beginning of the time-series) is greater than the noise (standard deviation taken across the ensemble). Red dots show when the signal is 1.645 times the noise, while magenta dots show the same when the signal is greater than 2 times the noise. These thresholds correspond to the *likely*, *very likely* and *extremely likely* ranges.

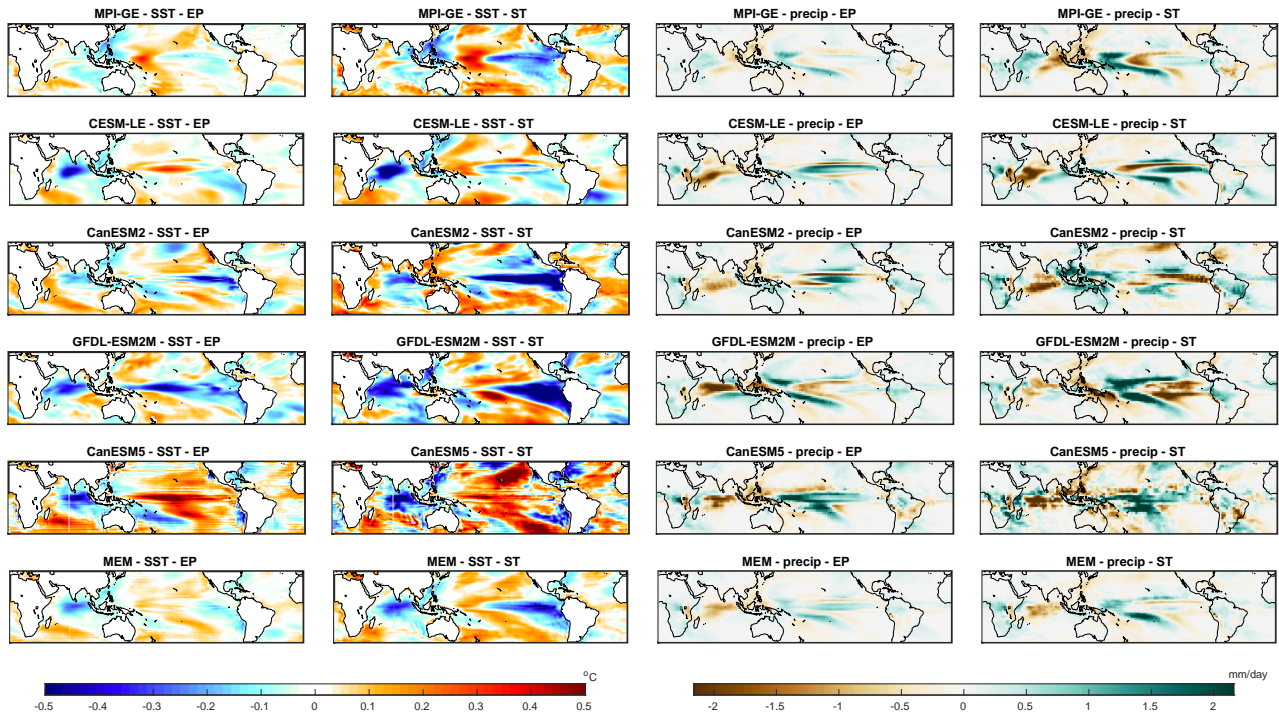

**Figure S9.** Change in SST and precipitation patterns (left and right columns respectively) in each SMILE in the period 2050-2099 as compared to 1950-1999 for EP and ST events. Shown for each individual SMILE (in order of appearance; MPI-GE, CESM-LE, CanESM2, GFDL-ESM2M, CanESM5 and IPSL-CM5). SST and precipitation patterns are calculated as the November, December, January average and composited for each event type over each time-period. SMILE data has the forced response (ensemble mean) removed prior to calculation.

- K., Zhang, L., and Zhong, W.: Changing El Niño-Southern Oscillation in a warming climate, *Nature Reviews Earth Environment*, <https://doi.org/10.1038/s43017-021-00199-z>, 2021.
- Carton, J. A., Chepurin, G. A., and Chen, L.: SODA3: A New Ocean Climate Reanalysis, *Journal of Climate*, 31, 6967 – 6983, <https://doi.org/10.1175/JCLI-D-18-0149.1>, 2018.
- 95 Hirahara, S., Ishii, M., and Fukuda, Y.: Centennial-scale sea surface temperature analysis and its uncertainty, *Journal of Climate*, 27, 57–75, 2014.
- Huang, B., Banzon, V. F., Freeman, E., Lawrimore, J., Liu, W., Peterson, T. C., Smith, T. M., Thorne, P. W., Woodruff, S. D., and Zhang, H.-M.: Extended Reconstructed Sea Surface Temperature (ERSST), Version 4., NOAA National Centers for Environmental Information, <https://doi.org/doi:10.7289/V5KD1VVF>, 2015.
- 100 Huang, B., Thorne, P. W., Banzon, V. F., Boyer, T., Chepurin, G., Lawrimore, J. H., Menne, M. J., Smith, T. M., Vose, R. S., and Zhang, H.-M.: NOAA Extended Reconstructed Sea Surface Temperature (ERSST), Version 5, NOAA National Centers for Environmental Information, <https://doi.org/doi:10.7289/V5T72FNM>, 2017.
- Ishii, M. A., Sugimoto, S. S., and Matsumoto, T.: Objective Analyses of Sea-Surface Temperature and Marine Meteorological Variables for the 20th Century using ICOADS and the Kobe Collection, *International Journal of Climatology*, 2005.

- 105 Jeffrey, S. et al.: Australia's CMIP5 submission using the CSIRO-Mk3.6 model, *Australian Meteorological and Oceanographic Journal*, 63, 1–13, 2012.
- Kaplan, A., Cane, M., Kushnir, Y., Clement, A., Blumenthal, M., and Rajagopalan, B.: Analyses of global sea surface temperature 1856–1991, *Journal of Geophysical Research*, 103, 18 567–18 589, 1998.
- Kay, J. E. et al.: The Community Earth System Model (CESM) Large Ensemble Project: A Community Resource for Studying
- 110 Climate Change in the Presence of Internal Climate Variability, *Bulletin of American Meteorological Society*, 96, 1333–1349, <https://doi.org/10.1175/BAMS-D-13-00255.1>, 2015.
- Kirchmeier-Young, M., Zwiers, F., and Gillett, N.: Attribution of Extreme Events in Arctic Sea Ice Extent, *Journal of Climate*, 30, 553–571, <https://doi.org/10.1175/JCLI-D-16-0412.1>, 2017.
- Kushner, P. J., Mudryk, L. R., Merryfield, W., Ambadan, J. T., Berg, A., Bichet, A., Brown, R., Derksen, C., Déry, S. J., Dirkson, A., Flato,
- 115 G., Fletcher, C. G., Fyfe, J. C., Gillett, N., Haas, C., Howell, S., Laliberté, F., McCusker, K., Sigmond, M., Sospedra-Alfonso, R., Tandon, N. F., Thackeray, C., Tremblay, B., and Zwiers, F. W.: Canadian snow and sea ice: assessment of snow, sea ice, and related climate processes in Canada's Earth system model and climate-prediction system, *The Cryosphere*, 12, 1137–1156, <https://doi.org/10.5194/tc-12-1137-2018>, 2018.
- Köhl, A.: Evaluation of the GECCO2 Ocean Synthesis: Transports of Volume, Heat and Freshwater in the Atlantic, *Quarterly Journal of the*
- 120 *Royal Meteorological Society*, 141, 166–181, <https://doi.org/doi:10.1002/qj.2347>, 2015.
- Maher, N., Milinski, S., Suarez-Gutierrez, L., Botzet, M., Dobrynin, M., Kornblueh, L., Kröger, J., Takano, Y., Ghosh, R., Hedemann, C., Li, C., Li, H., Manzini, E., Notz, D., Putrasahan, D., Boysen, L., Claussen, M., Ilyina, T., Olonscheck, D., Raddatz, T., Stevens, B., and Marotzke, J.: The Max Planck Institute Grand Ensemble: Enabling the Exploration of Climate System Variability, *Journal of Advances in Modeling Earth Systems*, 11, 2050–2069, <https://doi.org/10.1029/2019MS001639>, 2019.
- 125 Rayner, N. A., Parker, D. E., Horton, E. B., Folland, C. K., Alexander, L. V., Rowell, D. P., Kent, E. C., and Kaplan, A.: Global analyses of sea surface temperature, sea ice, and night marineair temperature since the late nineteenth century, *Journal of Geophysical Research*, 108, <https://doi.org/doi:10.1029/2002JD002670>, 2003.
- Reynolds, R. W., Smith, T. M., Liu, C., Chelton, D. B., Casey, K. S., and Schlax, M. G.: Daily High-Resolution-Blended Analyses for Sea Surface Temperature, *Journal of Climate*, 20, 5473–5496, 2007.
- 130 Rodgers, K. B., Lin, J., and Frölicher, T. L.: Emergence of multiple ocean ecosystem drivers in a large ensemble suite with an Earth system model, *Biogeosciences*, 12, 3301–3320, 2015.
- Smith, T. M., Reynolds, R. W., Peterson, T. C., and Lawrimore, J.: Extended Reconstructed Sea Surface Temperature (ERSST) Monthly Analysis, Version 3b, NOAA National Climatic Data Center., <https://doi.org/doi:10.7289/V5Z31WJ4>, 2010.
- Swart, N. C., Cole, J. N. S., Kharin, V. V., Lazare, M., Scinocca, J. F., Gillett, N. P., Anstey, J., Arora, V., Christian, J. R., Hanna, S.,
- 135 Jiao, Y., Lee, W. G., Majaess, F., Saenko, O. A., Seiler, C., Seinen, C., Shao, A., Sigmond, M., Solheim, L., von Salzen, K., Yang, D., and Winter, B.: The Canadian Earth System Model version 5 (CanESM5.0.3), *Geoscientific Model Development*, 12, 4823–4873, <https://doi.org/10.5194/gmd-12-4823-2019>, 2019.
- Systems, R. S.: AMSRE 25km gridded SST data set. Ver. 7.0. PO.DAAC, CA, USA, <https://doi.org/https://doi.org/10.5067/GHAMS-2GR07>, 2014.
- 140 Wang, B., Luo, X., Yang, Y.-M., Sun, W., Cane, M. A., Cai, W., Yeh, S.-W., and Liu, J.: Historical change of El Niño properties sheds light on future changes of extreme El Niño, *Proceedings of the National Academy of Sciences*, 116, 22 512–22 517, <https://doi.org/10.1073/pnas.1911130116>, 2019.

- Zuo, H., Balmaseda, M. A., de Boisseson, E., Hirahara, S., Chrust, M., and De Rosnay, P.: generic ensemble generation scheme for data assimilation and ocean analysis, ECMWF Tech Memo, <https://doi.org/10.21957/cub7mq0i4>, 2017.
- 145 Zuo, H., Balmaseda, M. A., Tietsche, S., Mogensen, K., and Mayer, M.: The ECMWF operational ensemble reanalysis–analysis system for ocean and sea ice: a description of the system and assessment, *Ocean Sciences*, 15, 779–808, <https://doi.org/10.5194/os-15-779-2019>, 2019.
